# Supplementary material for: A Huluwa phosphorylation switch regulates embryonic axis induction
Source: PubMed Central journal article supplement (PMC11576741; doi:10.1038/s41467-024-54450-4), 2024-11-19
Supplement: 41467_2024_54450_MOESM1_ESM.pdf [file 41467_2024_54450_MOESM1_ESM.pdf]

1  
2  
3  
4  
5  
6  
7  
8  
9  
10  
11  
12  
13  
14  
15

**Supplementary Information for**  
**A Huluwa phosphorylation switch regulates embryonic axis**  
**induction**

Yao Li, Yun Yan, Bo Gong, Qianwen Zheng, Haiyan Zhou, Jiarui Sun, Mingpeng Li,  
Zhao Wang, Yaohui Li, Yunjing Wan, Weixi Chen, Shiqian Qi, Xianming Mo, Anming  
Meng, Bo Xiang, Jing Chen

\*Correspondence author: [jingchen@scu.edu.cn](mailto:jingchen@scu.edu.cn) (J.C.)

**This file includes:**

- 1. Supplementary Fig. 1- 11**
- 2. Source data of Supplementary information :**

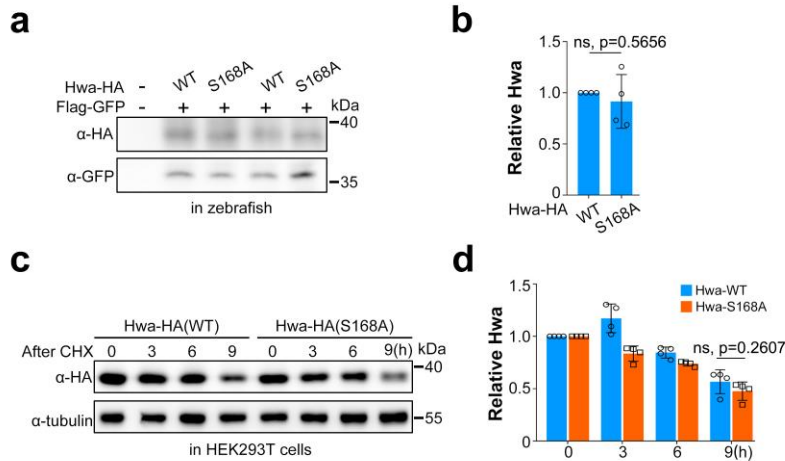

16

17 **Supplementary Fig. 1. S168A point mutation does not affect the stability of Hwa.**

18 (a) Immunoblotting of Hwa-HA and Flag-GFP in zebrafish embryos injected with 200  
 19 pg WT or S168A mutant *hwa*-HA mRNA with 200 pg Flag-*gfp* mRNA at the 1-cell  
 20 stage and harvested at 4 hpf. (b) Quantifications of relative Hwa protein levels in  
 21 embryos treated as in (a), N=4. (c) Immunoblotting of Hwa in cells transfected with  
 22 wild-type or S168A Hwa-HA plasmids, followed by treatment with cycloheximide  
 23 (CHX; 100  $\mu$ g/ml) and harvesting at the indicated time points. (d) Quantifications of  
 24 relative Hwa protein levels treated as in (c), N=4. GFP (a) and  $\alpha$ -tubulin (c) were used  
 25 as references for quantification. (b & d) A two-tailed unpaired t test was performed and  
 26 data were presented as mean  $\pm$  SD. N, number of biological replicates; Significant  
 27 differences are indicated by ns  $\geq$  0.05, \* $p$  < 0.05, \*\* $p$  < 0.01, \*\*\* $p$  < 0.001, and \*\*\*\* $p$   
 28 < 0.0001. Source data are provided at the end of the Supplementary Information file.

29

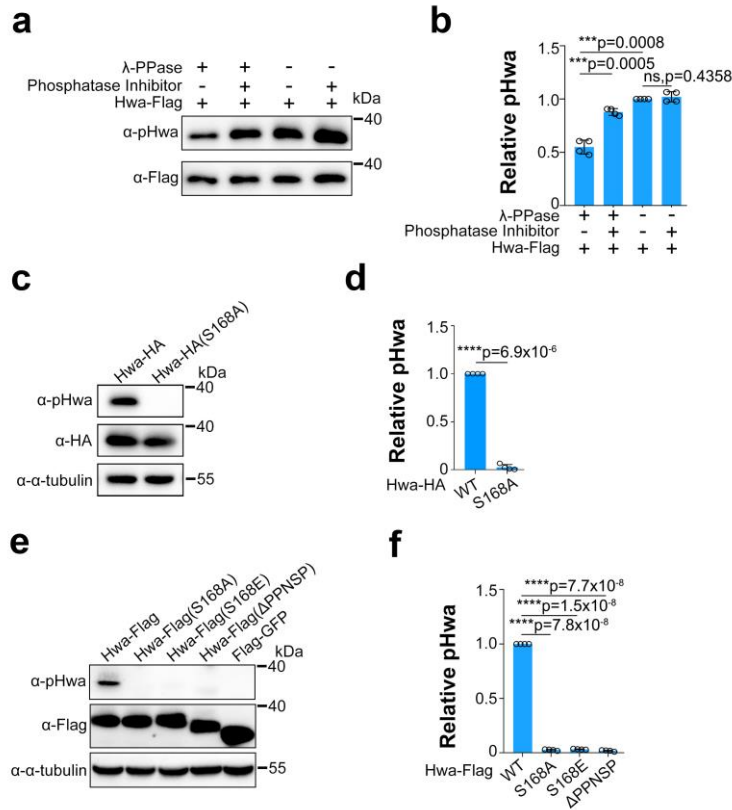

30

31 **Supplementary Fig. 2. Verification of the specificity of the pHwa antibody.**

32 (a) Immunoblotting of pHwa from samples treated with  $\lambda$ -PPase or  $\lambda$ -PPase &  
 33 phosphatase inhibitor. (b) Quantifications of relative pHwa treated as in (a), N=4. (c)  
 34 Immunoblotting of pHwa in HEK293T cells transfected with wild-type or S168A Hwa-  
 35 HA mutant. (d) Quantifications of relative pHwa levels treated as in (c), N=4. (e)  
 36 Immunoblotting of pHwa in HEK293T cells transfected with wild-type or mutants of  
 37 Hwa-Flag. (f) Quantifications of relative pHwa treated as in (e), N=4. (b, d & f) A two-  
 38 tailed unpaired t test was performed and data were presented as mean  $\pm$  SD. N, number  
 39 of biological replicates; Significant differences are indicated by ns  $\geq$  0.05, \*p < 0.05,  
 40 \*\*p < 0.01, \*\*\*p < 0.001, and \*\*\*\*p < 0.0001. Source data are provided at the end of  
 41 the Supplementary Information file.

42

**a**

| Locations (AA) | Phosphorylated Sites | HMM Bit Score | E-value | Catalytic Kinases | HMMs | Logo |
|----------------|----------------------|---------------|---------|-------------------|------|------|
| 168            | VPPNSPVLR            | 1.8           | 0.032   | CDK               | HMM  |      |

<http://kinasephos.mbc.nctu.edu.tw/predict.php>

|               |           |
|---------------|-----------|
| CDK substrate | SPxxK/R   |
| Hwa           | VPPNSPVLR |

**b**

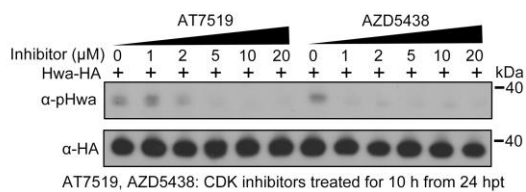

43

44

**Supplementary Fig. 3. AT7519 and AZD5438 decreased pHwa in HEK293T cells.**

45

46

47

48

49

50

51

52

53

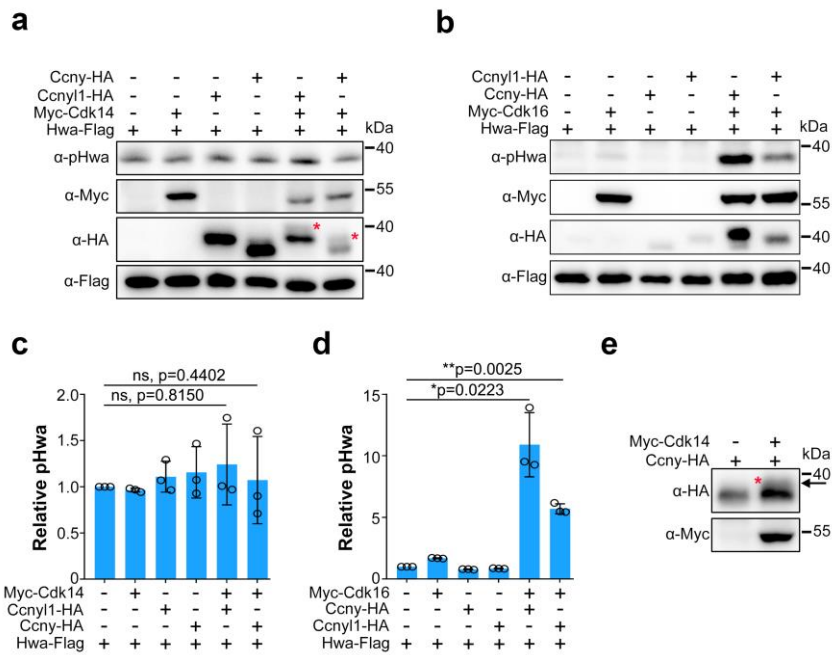

54

55 **Supplementary Fig. 4. Cdk16, but not Cdk14, elevated p<sub>Hwa</sub> with Ccny/Ccny11.**  
56 (a) Immunoblotting of p<sub>Hwa</sub> in HEK293T cells transfected with Hwa-Flag and Myc-  
57 Cdk14, in the absence or presence of Cyclin Y proteins (Ccny/Ccny11-HA). (b)  
58 Immunoblotting of p<sub>Hwa</sub> in HEK293T cells transfected with Hwa-Flag and Myc-  
59 Cdk16, in the absence or presence of Cyclin Y (Ccny/Ccny11-HA). Total Hwa-Flag  
60 was applied as the reference. (c) and (d) Statistics of relative p<sub>Hwa</sub> in (a) and (b),  
61 respectively, N=3. (e) Immunoblotting of phosphorylated Ccny (a migration-shift band  
62 indicated by the black arrow) in HEK293T cells transfected with Ccny-HA alone or  
63 cotransfected with Myc-Cdk14. The red star indicates the migration-shift band of  
64 phosphorylated Ccny/Ccny11 in (a & e). Total Hwa proteins (a & b) were used as  
65 references for quantification. (c & d) A two-tailed unpaired t test was performed and  
66 data were presented as mean ± SD. N, number of biological replicates; Significant  
67 differences are indicated by ns ≥ 0.05, \*p < 0.05, \*\*p < 0.01, \*\*\*p < 0.001, and \*\*\*\*p  
68 < 0.0001, with individual p-values shown. Source data are provided at the end of the  
69 Supplementary Information file.

70

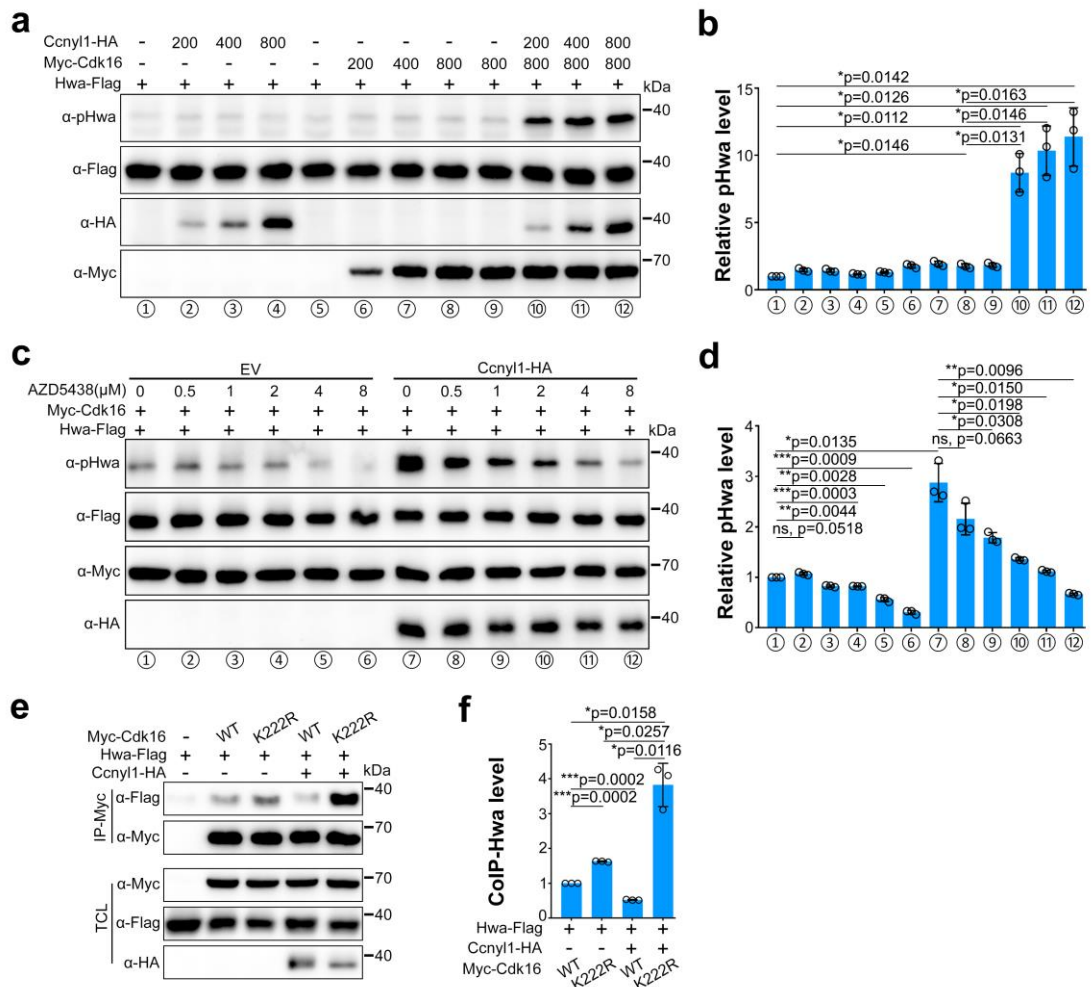

71

72 **Supplementary Fig. 5. Cdk16 interacted with and phosphorylated Hwa.**

73 (a) Immunoblotting of phosphorylated Hwa protein at Ser168 (pHwa) from HEK293T  
74 cells transfected with Hwa-Flag and Myc-Cdk16, in the absence or presence of Ccnyl1-  
75 HA. (b) Quantifications of relative pHwa levels in HEK293T cells treated as in (a),  
76 N=3. (c) Immunoblotting of pHwa from HEK293T cells cotransfected with Myc-  
77 Cdk16 and Ccnyl1-HA, followed by treatment with different doses of the CDK  
78 inhibitor AZD5438 (0-8 μM). (d) Quantifications of relative pHwa levels in HEK293T  
79 cells treated as in (c), N=3. (e) Coimmunoprecipitation of Hwa-Flag with wild-type and  
80 K222R mutant Myc-Cdk16 in the absence or presence of Ccnyl1-HA. The kinase-dead  
81 form Cdk16 showed a stronger interaction with Hwa in the presence of Ccnyl1-HA. (f)  
82 Quantifications of relative Co-IP Hwa in HEK293T cells treated as in (e), N=3. Total  
83 Hwa proteins (a, c & e) were used as references for quantification in immunoblotting.  
84 (b, d & f) A two-tailed unpaired t test was performed and data were presented as  
85 mean ± SD. N, number of biological replicates; Significant differences are indicated by  
86 ns ≥ 0.05, \*p < 0.05, \*\*p < 0.01, \*\*\*p < 0.001, and \*\*\*\*p < 0.0001, with individual p-  
87 value illustrated. Source data are provided at the end of the Supplementary Information  
88 file.

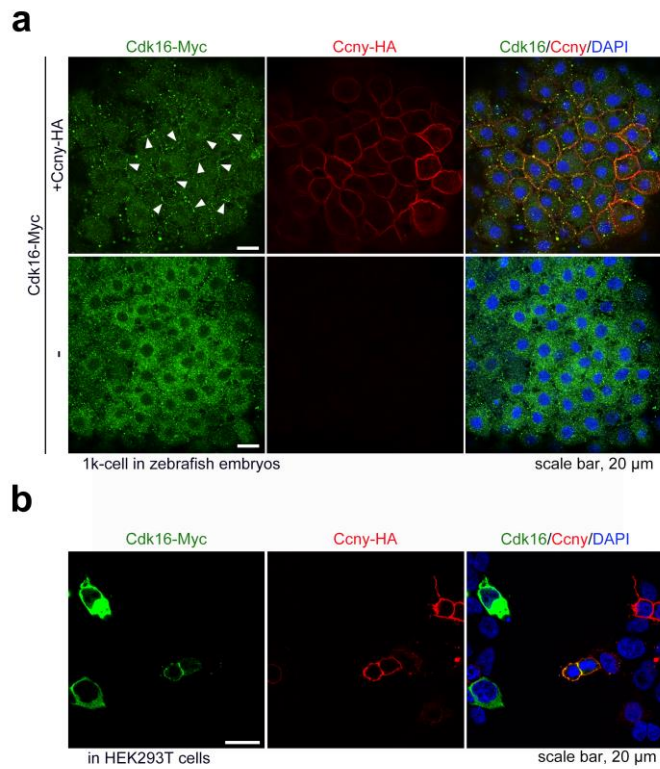

89

90 **Supplementary Fig. 6. Cdk16 was recruited to plasma membrane by Ccny.**

91 (a) Immunofluorescence of Cdk16-Myc and Ccny-HA in zebrafish embryos at the 1k-

92 cell stage, with arrowheads indicating the plasma membrane located Cdk16-Myc, N=3.

93 (b) Immunofluorescence of Cdk16-Myc and Ccny-HA in HEK293T cells, N=3. Cells

94 were stained with DAPI in blue; Scale bar, 20 μm. N, number of biological replicates.

95

96

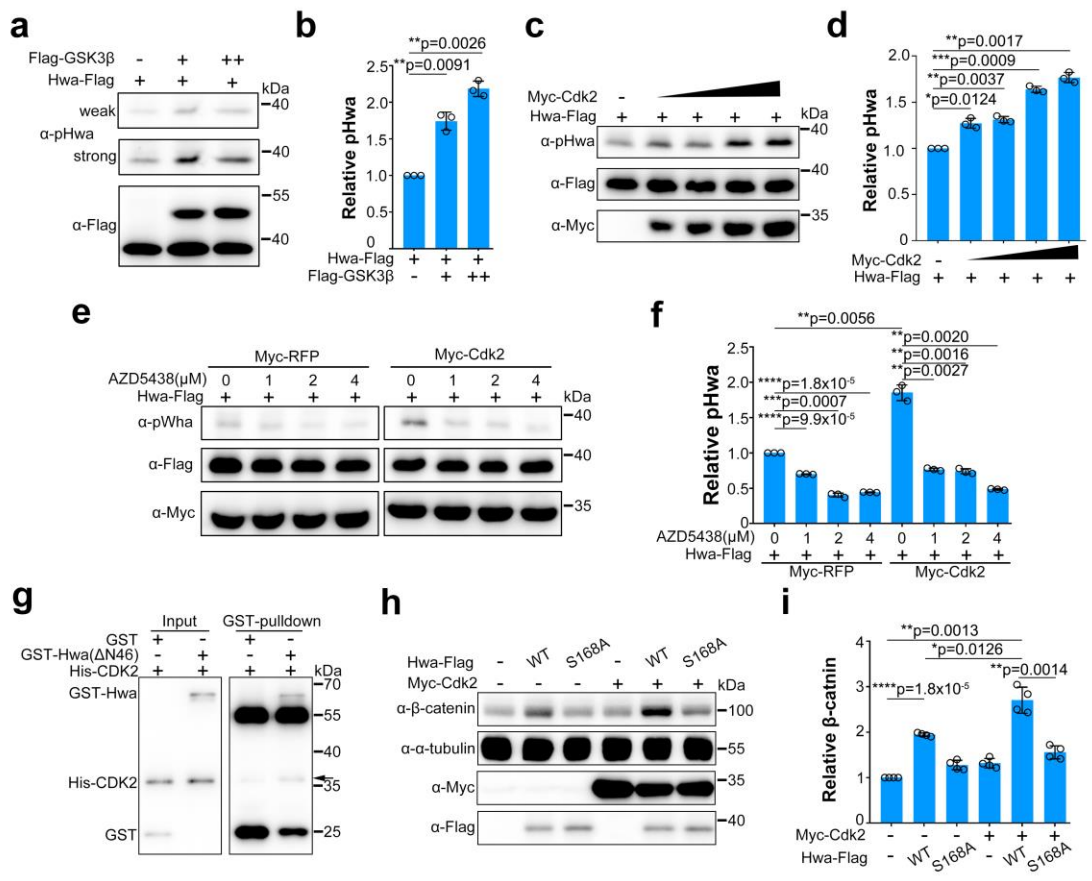

**Supplementary Fig. 7. GSK3β and Cdk2 phosphorylates Hwa at Ser168.**

(a) Immunoblotting of pHwa from HEK293T cells transfected with Hwa-Flag with or without Flag-tagged human GSK3β. (b) Quantifications of relative pHwa levels in HEK293T cells treated as in (a), N=3. (c) Immunoblotting of pHwa from HEK293T cells transfected with Hwa-Flag with different doses of Myc-Cdk2. (d) Quantifications of relative pHwa levels in HEK293T cells treated as in (c), N=3. (e) Immunoblotting of pHwa from HEK293T cells cotransfected Hwa-Flag with Myc-RFP or Myc-Cdk2, followed by treatment with different doses of the inhibitor AZD5438 (0-4 μM). (f) Quantifications of relative pHwa levels in HEK293T cells treated as in (e), N=3. (g) *in vitro* GST-pulldown assay of His-CDK2 with GST-Hwa(ΔN46) or GST, N=3. The arrow indicated the His-CDK2 protein. (h) Immunoblotting of cytosolic/active β-catenin in HEK293T cells transfected with Hwa-Flag (WT, S168A) alone or together with Myc-Cdk2. (i) Quantifications of relative pHwa levels in HEK293T cells treated as in (h), N=4. Total Hwa (a, c & e) and α-tubulin (h) proteins were used as references in immunoblotting. (b, d, f & i) A two-tailed unpaired t test was performed and data were presented as mean ± SD. N, number of biological replicates; Significant differences are indicated by ns ≥ 0.05, \*p < 0.05, \*\*p < 0.01, \*\*\*p < 0.001, and \*\*\*\*p < 0.0001, with individual p-value labeled. Source data are provided at the end of the Supplementary Information file.



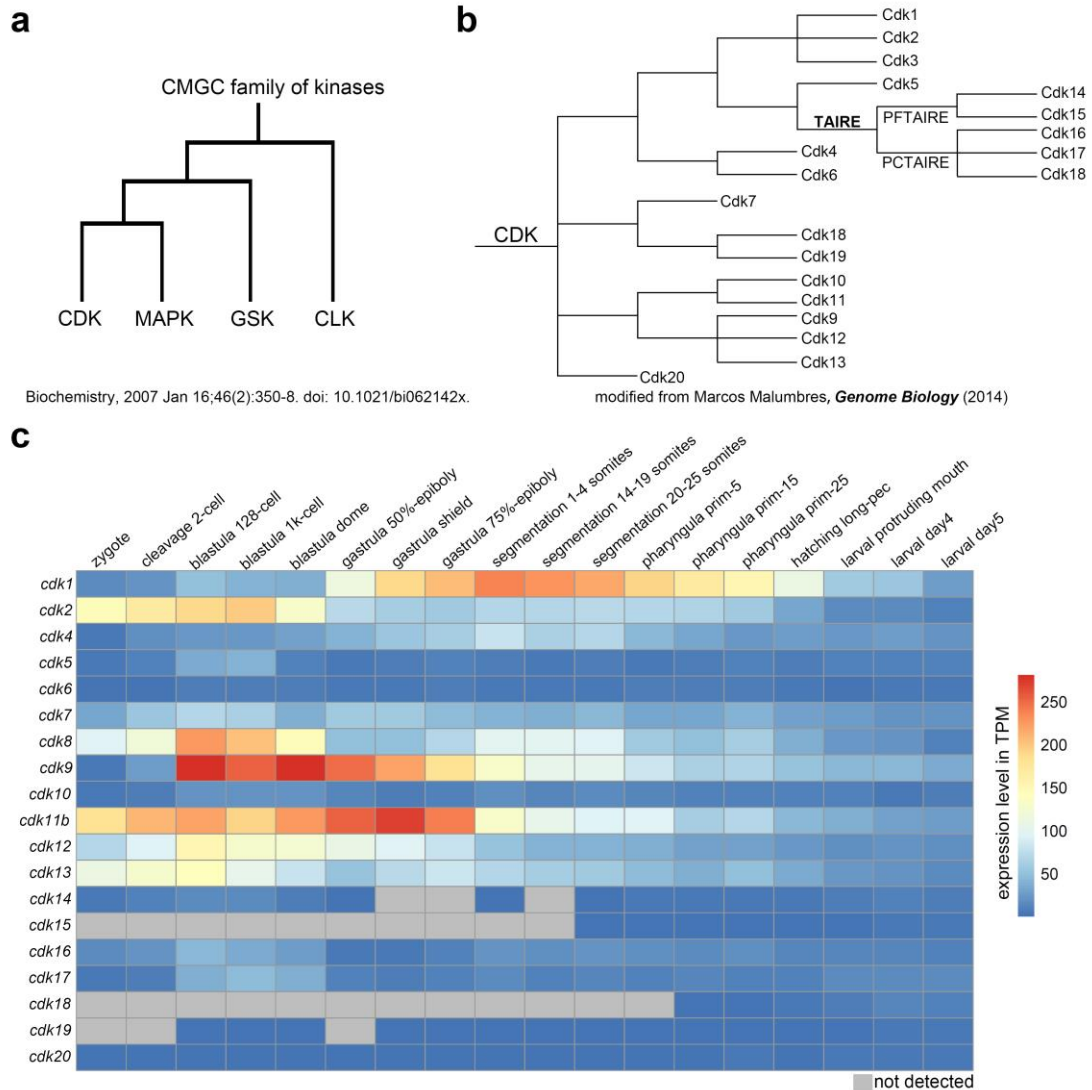

118

119 **Supplementary Fig. 8. CMGC kinase family and expression profile of *cdk* genes**  
 120 **in zebrafish.**

121 (a) The classification of the CMGC kinase family. (b) Members of the CDK subfamily,  
 122 derived from Marcos Malumbres, *Genome Biology* (2014). (c) Expression levels of  
 123 different *cdk* genes during zebrafish early developmental stages were plotted with data  
 124 from Expression Atlas. Expression levels are displayed in TPM (transcripts per million)  
 125 with color coding, while gray color indicates “not detected”.

126

127

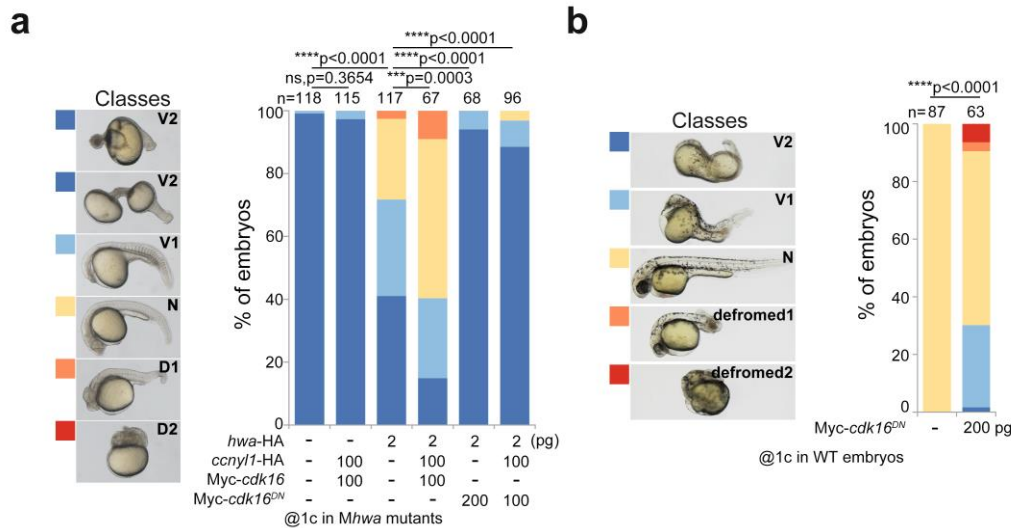

128

129 **Supplementary Fig. 9. Cdk16<sup>DN</sup> hindered the axis-inducing function of Hwa.**  
 130 (a) Rescue efficiency of *Mhwa*<sup>tsu01sm</sup> mutant embryos with a low dosage of *hwa* mRNA  
 131 (2 pg) together with wild-type and the dominant negative form of *Myc-cdk16*<sup>DN</sup> mRNA,  
 132 N=2. *Myc-cdk16* mRNA coexpressed with *ccny11*-HA mRNA failed to rescue the  
 133 *Mhwa*<sup>tsu01sm/tsu01sm</sup> mutant phenotype without *hwa* mRNA. (b) Effects of overexpression  
 134 of dominant negative *cdk16* (*cdk16*<sup>DN</sup>) mRNAs in WT embryos: some embryos shown  
 135 deformed phenotypes, N=2. V2<V1<N<D1<D2; V, ventralized; N, normal; D,  
 136 dorsalized. (a & b) A two-tailed Fisher's exact test was performed to evaluate  
 137 differences between treatments (all phenotypes were divided into two groups:  
 138 Unchanged [Class I] and Changed [Class II-V or Class II-IV]). N, number of biological  
 139 replicates; n, total number of embryos in each treatment; Significant differences are  
 140 indicated by ns ≥ 0.05, \*p < 0.05, \*\*p < 0.01, \*\*\*p < 0.001, and \*\*\*\*p < 0.0001. Source  
 141 data are provided at the end of the Supplementary Information file.  
 142

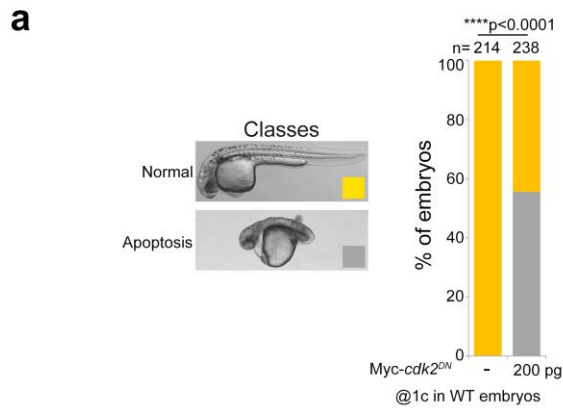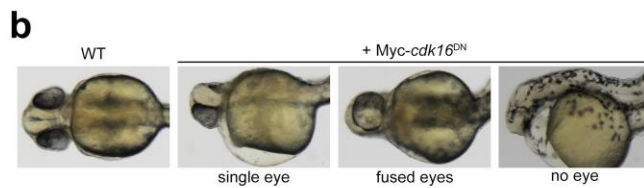

143

144 **Supplementary Fig. 10. Phenotypes of *Myc-cdk2*<sup>DN</sup> and *Myc-cdk16*<sup>DN</sup>**  
 145 **overexpression in WT embryos**

146 (a) Effects of overexpression of 200 pg dominant negative *cdk2* (*cdk2*<sup>DN</sup>) mRNA in  
 147 wild-type embryos, N=4. (b) Injection of 200 pg *Myc-cdk16*<sup>DN</sup> mRNA in WT embryos  
 148 at the 1-cell stage resulted in some embryos with single-eye/fused-eyes/no-eye  
 149 phenotypes, which was similar to that of blocking nodal signaling. (a) A two-tailed  
 150 Fisher's exact test was performed to evaluate differences between treatments. N,  
 151 number of biological replicates; n, total number of embryos in each treatment;  
 152 Significant differences are indicated by ns  $\geq$  0.05, \* $p$  < 0.05, \*\* $p$  < 0.01, \*\*\* $p$  < 0.001,  
 153 and \*\*\*\* $p$  < 0.0001. Source data are provided at the end of the Supplementary  
 154 Information file.

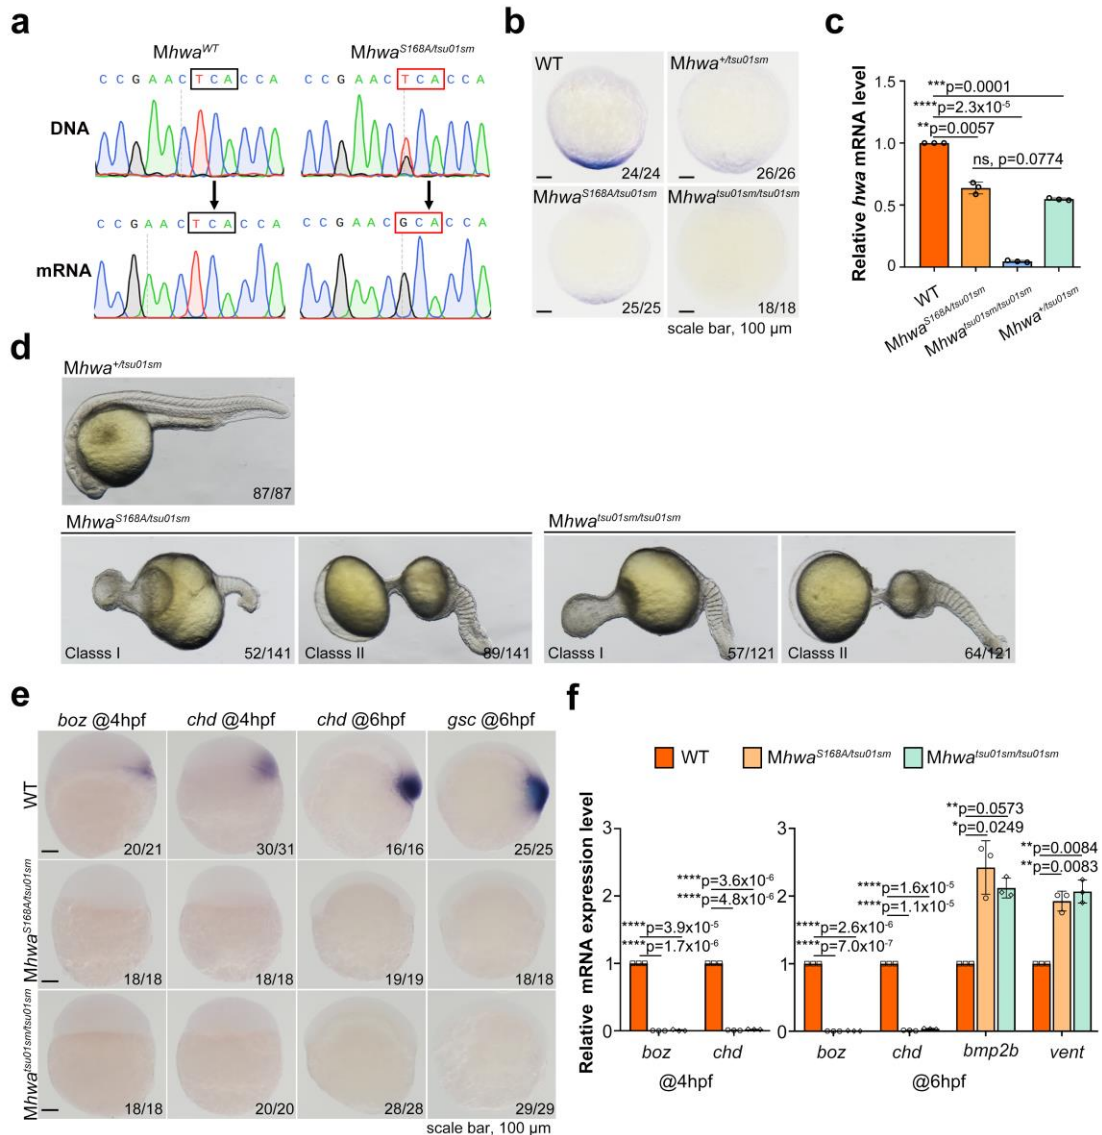

155

156 **Supplementary Fig. 11. The endogenous function of the S168A mutation in**  
 157 **zebrafish embryos.**

158 (a) Sanger sequencing of WT and *Mhwa*<sup>S168A/tsu01sm</sup> females (DNA in the upper panel)  
 159 and derived embryos (mRNA in the lower panel) confirmed the successful construction  
 160 of the *hwa*<sup>S168A</sup> mutant line. WISH (b) and RT-qPCR (c) showed that the *hwa* mRNA  
 161 levels were similar in *Mhwa*<sup>S168A/tsu01sm</sup> and *Mhwa*<sup>+/tsu01sm</sup> embryos, while the expression  
 162 was almost absent in *Mhwa*<sup>tsu01sm/tsu01sm</sup> embryos, N=3. (d) Phenotypes of  
 163 *Mhwa*<sup>S168A/tsu01sm</sup> embryos were similar to those from *Mhwa*<sup>tsu01sm/tsu01sm</sup> mutants at 24  
 164 hpf and could be divided into two classes: both lacking an embryonic axis; while  
 165 *Mhwa*<sup>+/tsu01sm</sup> embryos were all normal. (e) Loss of expression of dorsal/organizer  
 166 markers (*boz* and *chd* at 4 hpf; *chd* and *gsc* at 6 hpf) was detected by WISH in  
 167 *Mhwa*<sup>S168A/tsu01sm</sup> and *Mhwa*<sup>tsu01sm/tsu01sm</sup> embryos. (f) Marker genes were quantified by  
 168 RT-qPCR at 4 hpf and 6 hpf for WT, *Mhwa*<sup>S168A/tsu01sm</sup> and *Mhwa*<sup>tsu01sm/tsu01sm</sup> embryos,  
 169 N=3. (c & f) A two-tailed unpaired t test was performed and data were presented as  
 170 mean ± SD. N, number of biological replicates; Significant differences are indicated by  
 171 ns ≥ 0.05, \*p < 0.05, \*\*p < 0.01, \*\*\*p < 0.001, and \*\*\*\*p < 0.0001, with individual p-

172 value labeled in each graph. Source data are provided at the end of the Supplementary  
173 Information file.

174 **Source data of supplementary information :**

175

176 **Source data of Supplementary Fig. 1:**

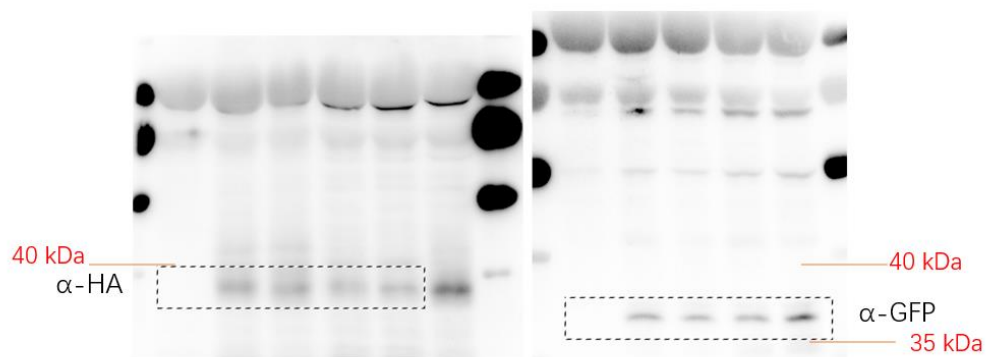

177

178 Supplementary Fig.1a, uncropped scans of all blots, detailed information has been labeled in the figure.

179

180

181

|          |          |          |          |          | Average  | STDEV    | p-value  |
|----------|----------|----------|----------|----------|----------|----------|----------|
| WT-HA    | 1        | 1        | 1        | 1        | 1        | 0        |          |
| S168A-HA | 1.254411 | 0.990007 | 0.687156 | 0.730356 | 0.915483 | 0.262572 | 0.565557 |

182 Supplementary Fig.1b, Specific values of quantifications of relative Hwa protein levels in embryos.

183

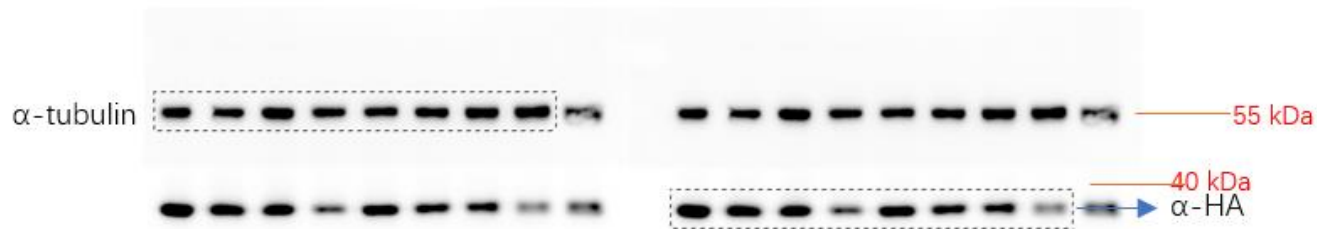

184  
185  
186  
187  
188  
189

Supplementary Fig.1c, uncropped scans of all blots, detailed information has been labeled in the figure.

|         |          |          |          |          | Average  | STDEV    |
|---------|----------|----------|----------|----------|----------|----------|
| WT-0    | 1        | 1        | 1        | 1        | 1        | 0        |
| WT-3    | 1.304104 | 1.094027 | 1.019931 | 1.271177 | 1.17231  | 0.137225 |
| WT-6    | 0.835441 | 0.881294 | 0.774472 | 0.889713 | 0.84523  | 0.052858 |
| WT-9    | 0.396793 | 0.63434  | 0.600264 | 0.633806 | 0.566301 | 0.114124 |
| S168A-0 | 1        | 1        | 1        | 1        | 1        | 0        |
| S168A-3 | 0.729183 | 0.879277 | 0.847093 | 0.885779 | 0.835333 | 0.07276  |
| S168A-6 | 0.740513 | 0.705717 | 0.754782 | 0.756497 | 0.739377 | 0.023556 |
| S168A-9 | 0.347149 | 0.523938 | 0.49762  | 0.536679 | 0.476347 | 0.087653 |

190  
191  
192

Supplementary Fig.1d, Specific values of quantifications of relative Hwa protein levels.

193 **Source data of Supplementary Fig. 2:**

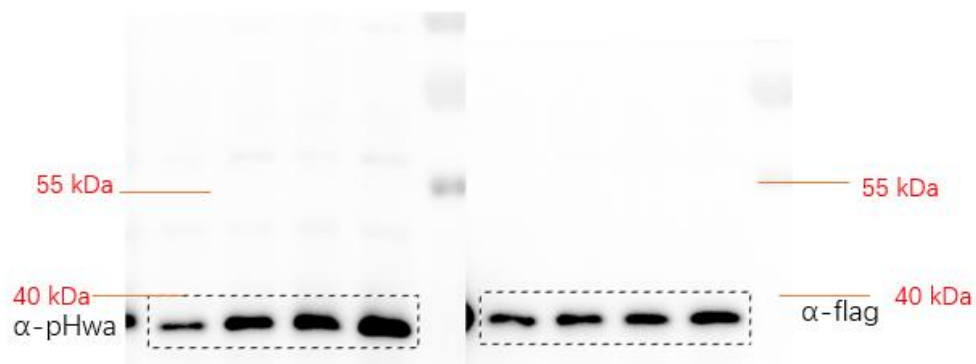

194  
195 Supplementary Fig.2a, uncropped scans of all blots, detailed information has been labeled in the figure.

196  
197  
198

|                 |          |          |          |          | average  | STDEV    |
|-----------------|----------|----------|----------|----------|----------|----------|
| Ctr             | 1        | 1        | 1        | 1        | 1        | 0        |
| Inhibitor       | 1.061319 | 0.980177 | 1.065272 | 0.979649 | 1.021604 | 0.048168 |
| PPase           | 0.604031 | 0.476713 | 0.605391 | 0.511423 | 0.54939  | 0.065435 |
| PPase+Inhibitor | 0.906551 | 0.842963 | 0.905817 | 0.860212 | 0.878886 | 0.0323   |

199 Supplementary Fig.2b, Specific values of quantifications of relative pHwa.

200



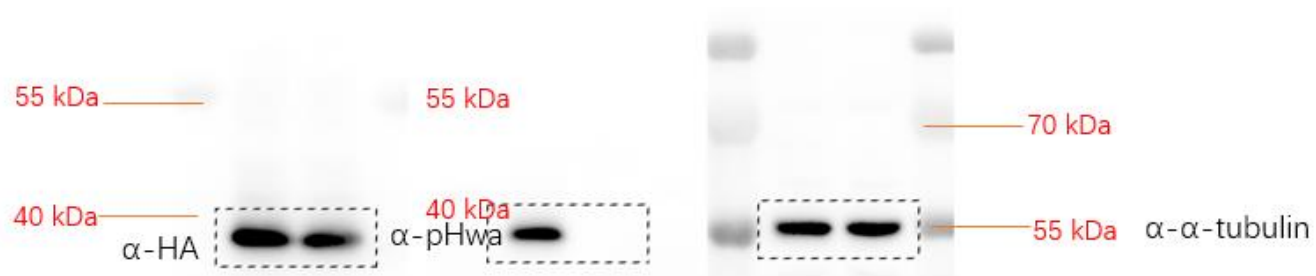

201  
202 Supplementary Fig.2c, uncropped scans of all blots, detailed information has been labeled in the figure.  
203

204  
205

| pHwa  |         |          |         |          | Average  | STDEV    | p-Value  |
|-------|---------|----------|---------|----------|----------|----------|----------|
| WT    | 1       | 1        | 1       | 1        | 1        | 0        |          |
| S168A | 0.00816 | 0.022938 | 0.06629 | 0.003767 | 0.025289 | 0.028538 | 6.91E-06 |

206 Supplementary Fig.2d, Specific values of quantifications of relative pHwa levels.  
207

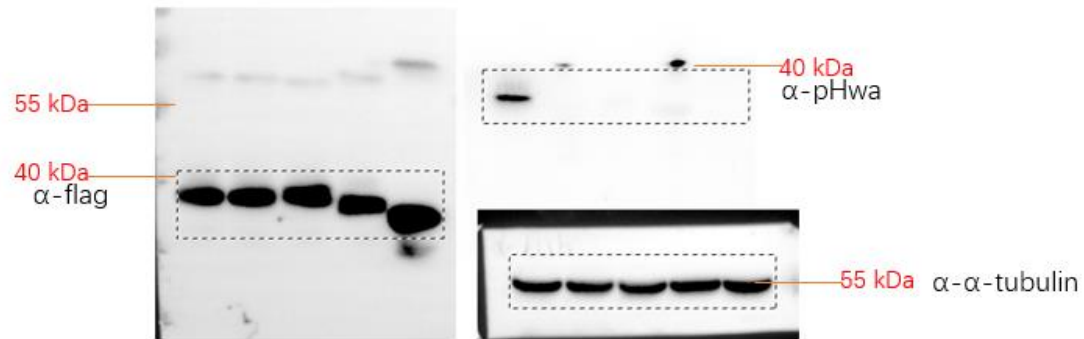

208  
209 Supplementary Fig.2e, uncropped scans of all blots, detailed information has been labeled in the figure.

210  
211  
212

|                  |          |          |          |          | Average  | STDEV    | P-Value  |
|------------------|----------|----------|----------|----------|----------|----------|----------|
| Flag-Hwa(WT)     | 1        | 1        | 1        | 1        | 1        | 0        |          |
| Flag-Hwa(S168A)  | 0.018082 | 0.030109 | 0.032583 | 0.025168 | 0.026485 | 0.006394 | 7.81E-08 |
| Flag-Hwa(S168E)  | 0.029132 | 0.033351 | 0.037518 | 0.03077  | 0.032693 | 0.003656 | 1.49E-08 |
| Flag-Hwa(dPPNSp) | 0.019458 | 0.021089 | 0.009231 | 0.02395  | 0.018432 | 0.006409 | 7.67E-08 |

213 Supplementary Fig.2f, Specific values of quantifications of relative pHwa .

214  
215  
216  
217

218 **Source data of Supplementary Fig. 3:**

219

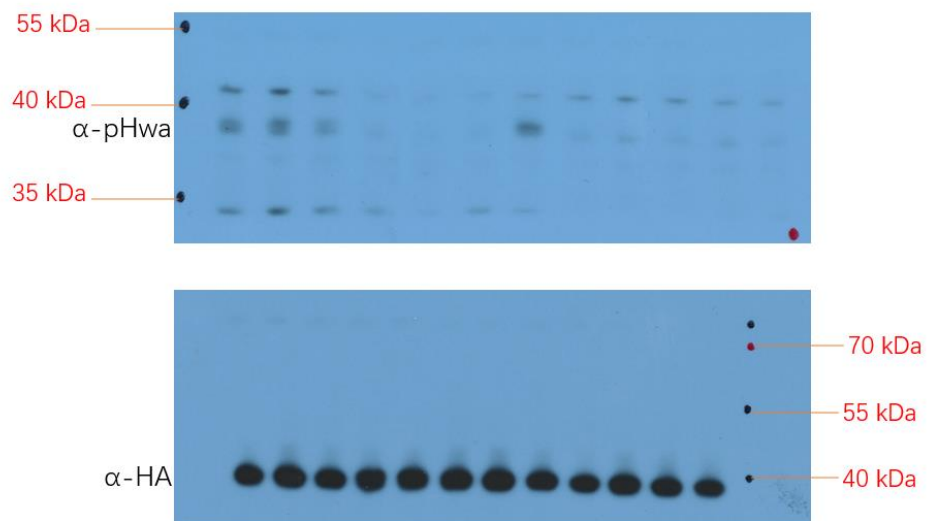

220

221 Supplementary Fig.3b, uncropped scans of all gels, detailed information has been labeled in the figure.

222

223 **Source data of Supplementary Fig. 4:**

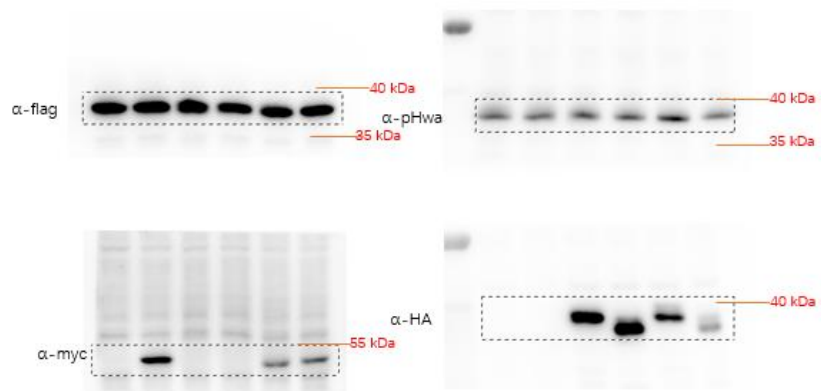

224  
225 Supplementary Fig.4a, uncropped scans of all blots, detailed information has been labeled in the figure.  
226

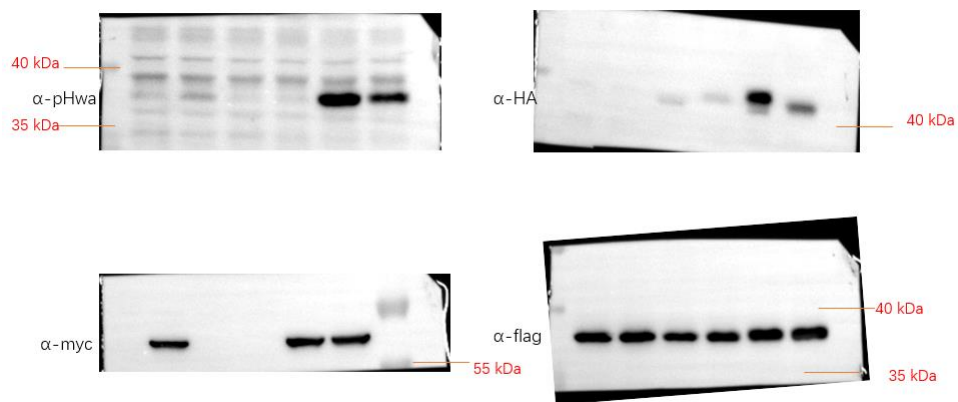

227  
228 Supplementary Fig.4b, uncropped scans of all blots, detailed information has been labeled in the figure.

229

|              |          |          |          | Average  | STDEV    |
|--------------|----------|----------|----------|----------|----------|
| EV           | 1        | 1        | 1        | 1        | 0        |
| Cdk14        | 0.967145 | 0.941568 | 0.982109 | 0.963607 | 0.020501 |
| Ccny         | 1.29237  | 0.964266 | 1.069514 | 1.108717 | 0.167528 |
| Ccny11       | 1.467017 | 0.928605 | 1.074769 | 1.156797 | 0.278421 |
| Cdk14+Ccny   | 1.746816 | 0.970754 | 1.007165 | 1.241578 | 0.437927 |
| Cdk14+Ccny11 | 1.607466 | 0.900232 | 0.710281 | 1.07266  | 0.472794 |

230 Supplementary Fig.4c, Statistics of relative pHwa protein.

231

232

233

234

|              |          |          |          | Average  | STDEV    |
|--------------|----------|----------|----------|----------|----------|
| EV           | 1        | 1        | 1        | 1        | 0        |
| Cdk16        | 1.693286 | 1.6602   | 1.713051 | 1.688845 | 0.026704 |
| Ccny         | 0.798929 | 0.753302 | 0.802192 | 0.784808 | 0.027333 |
| Ccny11       | 0.836635 | 0.844341 | 0.885442 | 0.855473 | 0.026239 |
| Cdk16+Ccny   | 13.90698 | 9.264641 | 9.534279 | 10.90197 | 2.60591  |
| Cdk16+Ccny11 | 6.171502 | 5.482484 | 5.445777 | 5.699921 | 0.408814 |

235 Supplementary Fig.4d, Statistics of relative pHwa protein.

236

237

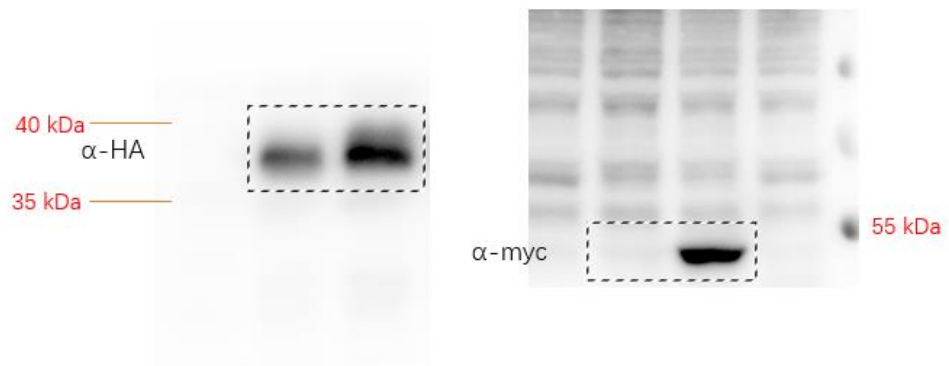

238  
239 Supplementary Fig.4e, uncropped scans of all blots, detailed information has been labeled in the figure.  
240

241 **Source data of Supplementary Fig. 5:**

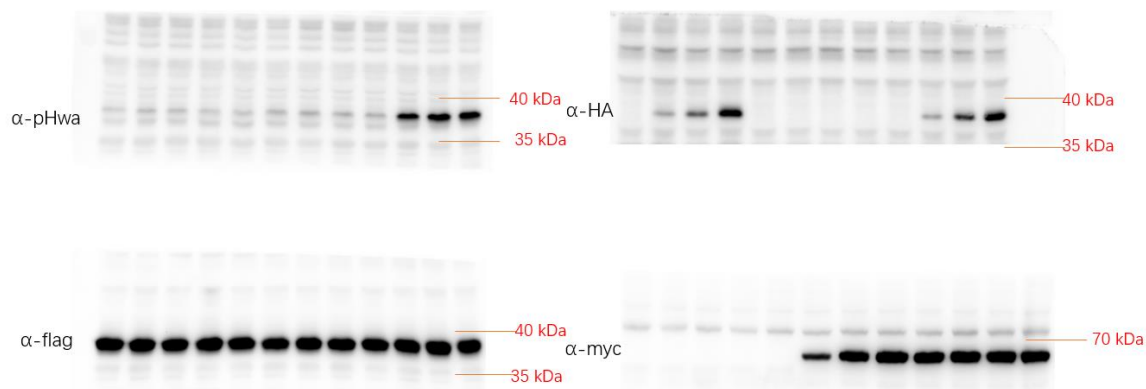

242  
243 Supplementary Fig.5a, uncropped scans of all blots, detailed information has been labeled in the figure.

244  
245

|          |          |          |          | Average  | STDEV    |
|----------|----------|----------|----------|----------|----------|
| Cdk16-1  | 1        | 1        | 1        | 1        | 0        |
| Cdk16-2  | 1.427467 | 1.605504 | 1.363785 | 1.465585 | 0.125287 |
| Cdk16-3  | 1.379244 | 1.551027 | 1.338199 | 1.422823 | 0.112908 |
| Cdk16-4  | 1.142319 | 1.22073  | 1.132826 | 1.165292 | 0.048245 |
| Cdk16-5  | 1.298487 | 1.354297 | 1.231817 | 1.294867 | 0.06132  |
| Cdk16-6  | 1.819608 | 1.894624 | 1.615389 | 1.77654  | 0.144513 |
| Cdk16-7  | 1.915496 | 2.143667 | 1.783137 | 1.947433 | 0.182375 |
| Cdk16-8  | 1.730444 | 1.936633 | 1.618729 | 1.761935 | 0.161275 |
| Cdk16-9  | 1.80057  | 2.008938 | 1.690429 | 1.833313 | 0.161759 |
| Cdk16-10 | 8.79421  | 10.07848 | 7.237377 | 8.703356 | 1.422729 |

|          |          |          |          |          |          |
|----------|----------|----------|----------|----------|----------|
| Cdk16-11 | 10.63168 | 12.01579 | 8.383637 | 10.3437  | 1.833123 |
| Cdk16-12 | 11.87496 | 13.23049 | 8.995402 | 11.36695 | 2.162766 |

246 Supplementary Fig.5b, Specific values of quantifications of relative pHwa levels in HEK293T cells.

247

248

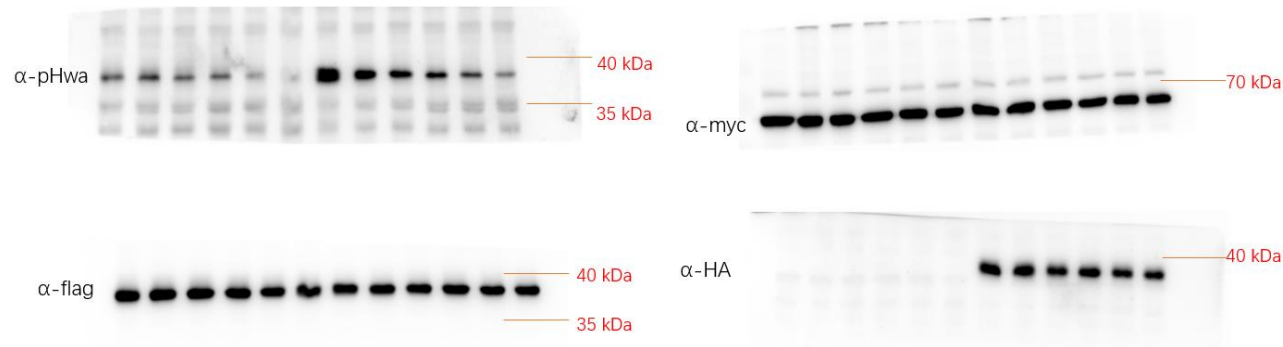

249

250 Supplementary Fig.5c, uncropped scans of all blots, detailed information has been labeled in the figure.

251

|                     |          |          |          | Average  | STDEV    |
|---------------------|----------|----------|----------|----------|----------|
| EV_AZD 0            | 1        | 1        | 1        | 1        | 0        |
| EV_AZD 0.5          | 1.043391 | 1.10078  | 1.066871 | 1.070347 | 0.028852 |
| EV_AZD 1            | 0.801592 | 0.829972 | 0.840798 | 0.82412  | 0.020247 |
| EV_AZD 2            | 0.817593 | 0.817212 | 0.827173 | 0.820659 | 0.005644 |
| EV_AZD 4            | 0.577243 | 0.51176  | 0.585513 | 0.558172 | 0.040406 |
| EV_AZD 8            | 0.325747 | 0.261532 | 0.325182 | 0.304153 | 0.036913 |
| Cdk16+Ccn11_AZD 0   | 2.694781 | 3.315196 | 2.621445 | 2.877141 | 0.381135 |
| Cdk16+Ccn11_AZD 0.5 | 1.981456 | 2.515808 | 1.961509 | 2.152924 | 0.314425 |



|                    |          |          |          |          |          |
|--------------------|----------|----------|----------|----------|----------|
| Cdk16+Ccnyl1_AZD 1 | 1.74355  | 1.900792 | 1.702903 | 1.782415 | 0.104512 |
| Cdk16+Ccnyl1_AZD 2 | 1.342739 | 1.392122 | 1.336692 | 1.357185 | 0.030408 |
| Cdk16+Ccnyl1_AZD 4 | 1.141979 | 1.096022 | 1.112227 | 1.116743 | 0.023309 |
| Cdk16+Ccnyl1_AZD 8 | 0.685284 | 0.646207 | 0.670499 | 0.66733  | 0.01973  |

252 Supplementary Fig.5d, Specific values of quantifications of relative pHwa levels in HEK293T cells.

253

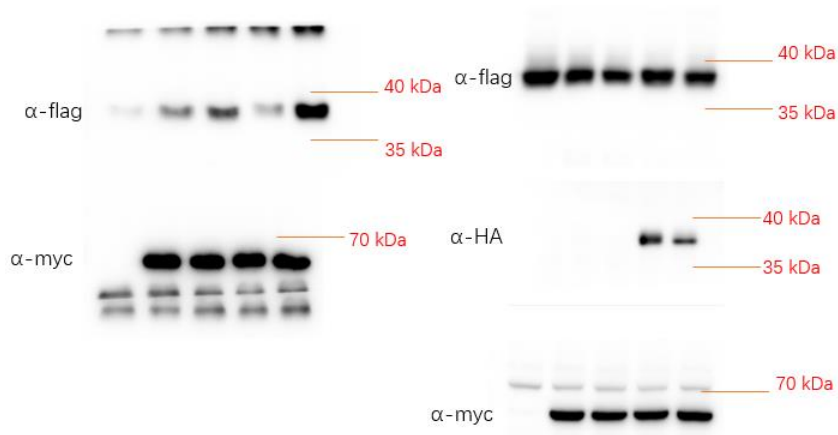

254

255 Supplementary Fig.5e, uncropped scans of all blots, detailed information has been labeled in the figure.

256

|                    |          |          |          | Average  | STDEV    |
|--------------------|----------|----------|----------|----------|----------|
| CDK16_WT           | 1        | 1        | 1        | 1        | 0        |
| CDK16_K222R        | 1.639776 | 1.608304 | 1.632062 | 1.626714 | 0.016404 |
| CDK16_WT+Ccnyl1    | 0.517029 | 0.516846 | 0.535308 | 0.523061 | 0.010607 |
| CDK16_K222R+Ccnyl1 | 3.112329 | 4.265601 | 4.095706 | 3.824545 | 0.62262  |

257 Supplementary Fig.5f, Specific values of quantifications of relative Co-IP Hwa in HEK293T cells.

258 **Source data of Supplementary Fig. 7:**

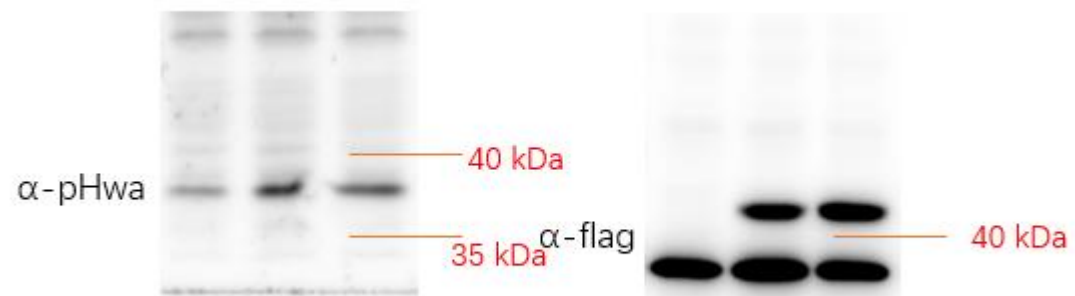

259  
260 Supplementary Fig.7a, uncropped scans of all blots, detailed information has been labeled in the figure.

261  
262  
263

|         |          |          |          | Average  | STDEV    | P-Value  |
|---------|----------|----------|----------|----------|----------|----------|
| GSK3b-  | 1        | 1        | 1        | 1        | 0        |          |
| GSK3b+  | 1.825649 | 1.797905 | 1.599728 | 1.741094 | 0.12321  | 0.009088 |
| GSK3b++ | 2.29869  | 2.091101 | 2.161732 | 2.183841 | 0.105546 | 0.002639 |

264 Supplementary Fig.7b, Specific values of quantifications of relative pHwa levels in HEK293T cells.

265

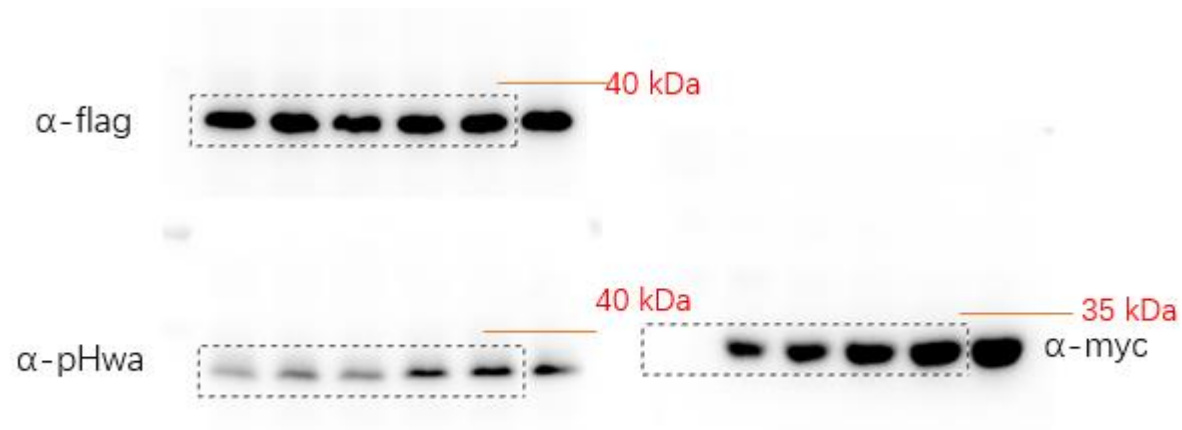

266  
267  
268  
269  
270

Supplementary Fig.7c, uncropped scans of all blots, detailed information has been labeled in the figure.

|        |          |          |          | Average  | STDEV    |
|--------|----------|----------|----------|----------|----------|
| Cdk2-0 | 1        | 1        | 1        | 1        | 0        |
| Cdk2-1 | 1.260741 | 1.225759 | 1.329658 | 1.272053 | 0.052865 |
| Cdk2-2 | 1.289344 | 1.296922 | 1.350254 | 1.312173 | 0.033196 |
| Cdk2-3 | 1.614944 | 1.676971 | 1.624961 | 1.638959 | 0.033299 |
| Cdk2-4 | 1.756869 | 1.826192 | 1.716371 | 1.766477 | 0.055537 |

271  
272

Supplementary Fig.7d, Specific values of quantifications of relative pHwa levels in HEK293T cells.

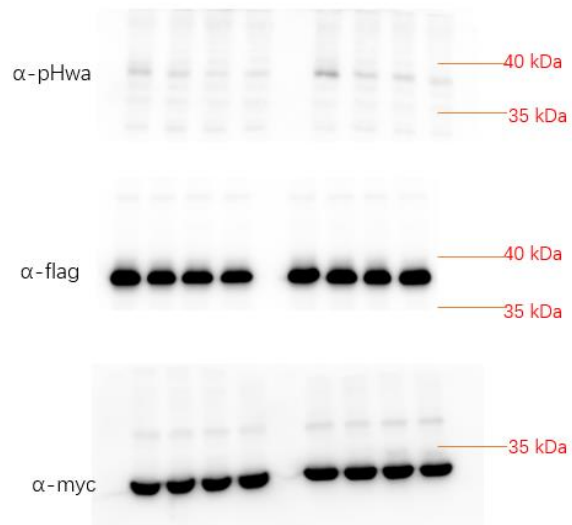

273  
274  
275

Supplementary Fig.7e, uncropped scans of all blots, detailed information has been labeled in the figure.

|            |          |          |          | Average  | STDEV    |
|------------|----------|----------|----------|----------|----------|
| EV_AZD-0   | 1        | 1        | 1        | 1        | 0        |
| EV_AZD-1   | 0.703841 | 0.694373 | 0.70273  | 0.700315 | 0.005176 |
| EV_AZD-2   | 0.369688 | 0.419241 | 0.414047 | 0.400992 | 0.027234 |
| EV_AZD-4   | 0.435893 | 0.443512 | 0.442551 | 0.440652 | 0.004149 |
| Cdk2_AZD-0 | 1.864454 | 1.734913 | 1.956351 | 1.851906 | 0.111251 |
| Cdk2_AZD-1 | 0.763578 | 0.746115 | 0.785151 | 0.764948 | 0.019554 |
| Cdk2_AZD-2 | 0.727468 | 0.710568 | 0.778845 | 0.73896  | 0.03556  |
| Cdk2_AZD-4 | 0.472208 | 0.485426 | 0.492921 | 0.483518 | 0.010487 |

276 Supplementary Fig.7f, Specific values of quantifications of relative pHwa leves in HEK293T cells.

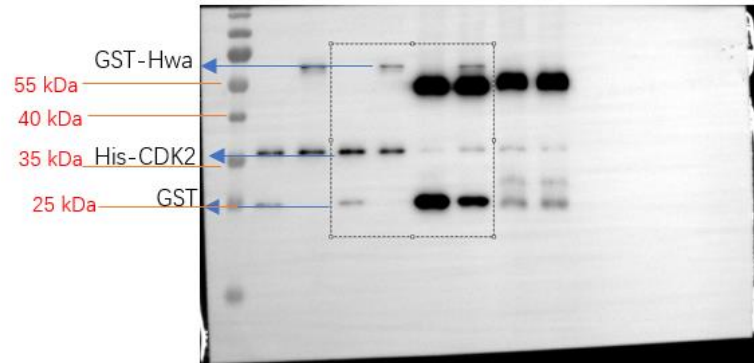

277  
 278 Supplementary Fig.7g, uncropped scans of blot, detailed information has been labeled in the figure.  
 279  
 280  
 281

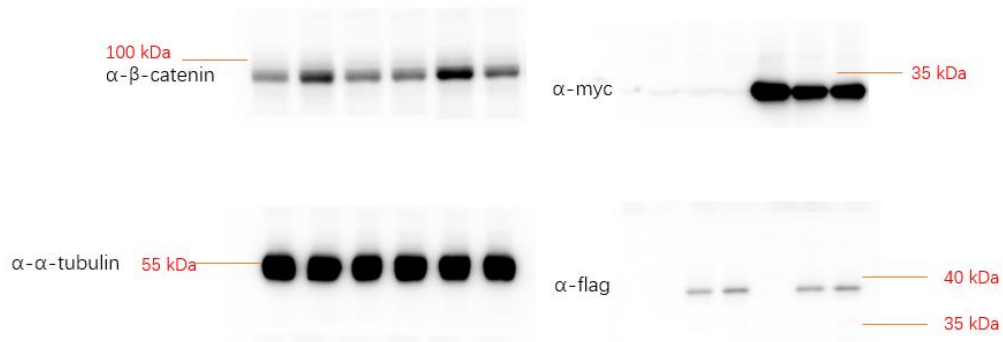

282  
 283 Supplementary Fig.7h, uncropped scans of all blots, detailed information has been labeled in the figure.

284

|                |          |          |          |          | Average  | STDEV    |
|----------------|----------|----------|----------|----------|----------|----------|
| EV             | 1        | 1        | 1        | 1        | 1        | 0        |
| Hwa-WT         | 1.930155 | 1.96052  | 1.98722  | 1.899468 | 1.944341 | 0.037926 |
| Hwa-S168A      | 1.398092 | 1.323582 | 1.195585 | 1.179132 | 1.274098 | 0.10489  |
| EV+Cdk2        | 1.459175 | 1.307877 | 1.271426 | 1.216135 | 1.313653 | 0.104088 |
| Hwa-WT+Cdk2    | 2.430845 | 3.043058 | 2.836223 | 2.499181 | 2.702327 | 0.288095 |
| Hwa-S168A+Cdk2 | 1.721601 | 1.631977 | 1.409564 | 1.460514 | 1.555914 | 0.145782 |

285 Supplementary Fig. 7i, Specific values of quantifications of relative pHwa levels in HEK293T cells.

286

287

288

289 **Source data of Supplementary Fig. 9:**

290

|                                      | V2     | V1      | N        | D1      | D2     |       |
|--------------------------------------|--------|---------|----------|---------|--------|-------|
| Sum                                  | ClassI | ClassII | ClassIII | ClassIV | ClassV | Total |
| Mhwa                                 | 117    | 1       | 0        | 0       | 0      | 118   |
| GFP 2pg+cdk16+ccnyl1 100+100pg       | 112    | 3       | 0        | 0       | 0      | 115   |
| hwa-HA 2pg+GFP 200pg                 | 48     | 36      | 30       | 3       | 0      | 117   |
| hwa-HA 2pg+cdk16+ccnyl1 100+100pg    | 10     | 17      | 34       | 6       | 0      | 67    |
| hwa-HA 2pg+cdk16-DN 200pg            | 64     | 4       | 0        | 0       | 0      | 68    |
| hwa-HA 2pg+cdk16-DN-ccnyl2 100+100pg | 85     | 8       | 3        | 0       | 0      | 96    |

291 Supplementary Fig.9a, Specific statistics in Fig.9a, numbers represent the number of zebrafish embryos.

292

293

| WT             | V2     | V1      | N        | deformed1 | deformed2 |       |
|----------------|--------|---------|----------|-----------|-----------|-------|
|                | ClassI | ClassII | ClassIII | ClassIV   | ClassV    | Total |
| AB             | 0      | 0       | 87       | 0         | 0         | 87    |
| AB+cdk16-DN200 | 1      | 18      | 38       | 2         | 4         | 63    |

294 Supplementary Fig.9b, specific statistics in Fig.9b, numbers represent the number of zebrafish embryos.

295

296

297

298 **Source data of Supplementary Fig. 10:**

299

| WT embryos  |        |           |       |
|-------------|--------|-----------|-------|
| Summary     | Normal | Apoptosis | Total |
| uninjection | 214    | 0         | 214   |
| cdk2 DN     | 121    | 117       | 238   |

300 Supplementary Fig.10a, specific statistics in Fig.10a, numbers represent the number of zebrafish embryos.

301



302 **Source data of Supplementary Fig. 11:**

303

|                 |          |          |          | Average  | STDEV    |
|-----------------|----------|----------|----------|----------|----------|
| WT              | 1        | 1        | 1        | 1        | 0        |
| S168A/tsu01sm   | 0.64551  | 0.586957 | 0.681206 | 0.637891 | 0.047584 |
| tsu01sm/tsu01sm | 0.054354 | 0.045769 | 0.03851  | 0.046211 | 0.007931 |
| wt/tsu01sm      | 0.540034 | 0.546307 | 0.558175 | 0.548172 | 0.009213 |

304 Supplementary Fig.11c, specific statistics of relative hwa mRNA levels

305

306

307

| 4 hpf       | WT |   |   | S168A/tsu01sm |          |          | tsu01sm/tsu01sm |          |          |
|-------------|----|---|---|---------------|----------|----------|-----------------|----------|----------|
| <i>boz</i>  | 1  | 1 | 1 | 0.003911      | 5.35E-05 | 4.94E-05 | 0.019432237     | 0.000209 | 0.001636 |
| <i>chd</i>  | 1  | 1 | 1 | 0.0066        | 0.005645 | 0.01257  | 0.018297691     | 0.02469  | 0.020903 |
|             |    |   |   |               |          |          |                 |          |          |
| 6 hpf       | WT |   |   | S168A/tsu01sm |          |          | tsu01sm/tsu01sm |          |          |
| <i>chd</i>  | 1  | 1 | 1 | 0             | 0.002796 | 0.000716 | 0.003762596     | 0.002397 | 0.007758 |
| <i>gsc</i>  | 1  | 1 | 1 | 0.004144      | 0.015092 | 0.012061 | 0.040408956     | 0.035526 | 0.027256 |
| <i>bmp</i>  | 1  | 1 | 1 | 1.969831      | 2.701364 | 2.599216 | 2.015618358     | 2.287804 | 2.053604 |
| <i>vent</i> | 1  | 1 | 1 | 1.756268      | 2.009843 | 2.012396 | 1.902025732     | 2.056002 | 2.241871 |

308 Supplementary Fig.11f, relative mRNA expression levels of the organizer-specific genes (*boz*, *chd*, *gsc*, *bmp2b*, and *vent*) at different stages.

309

310
